# Supplementary material
Source: PubMed Central journal article supplement (PMC6726378)

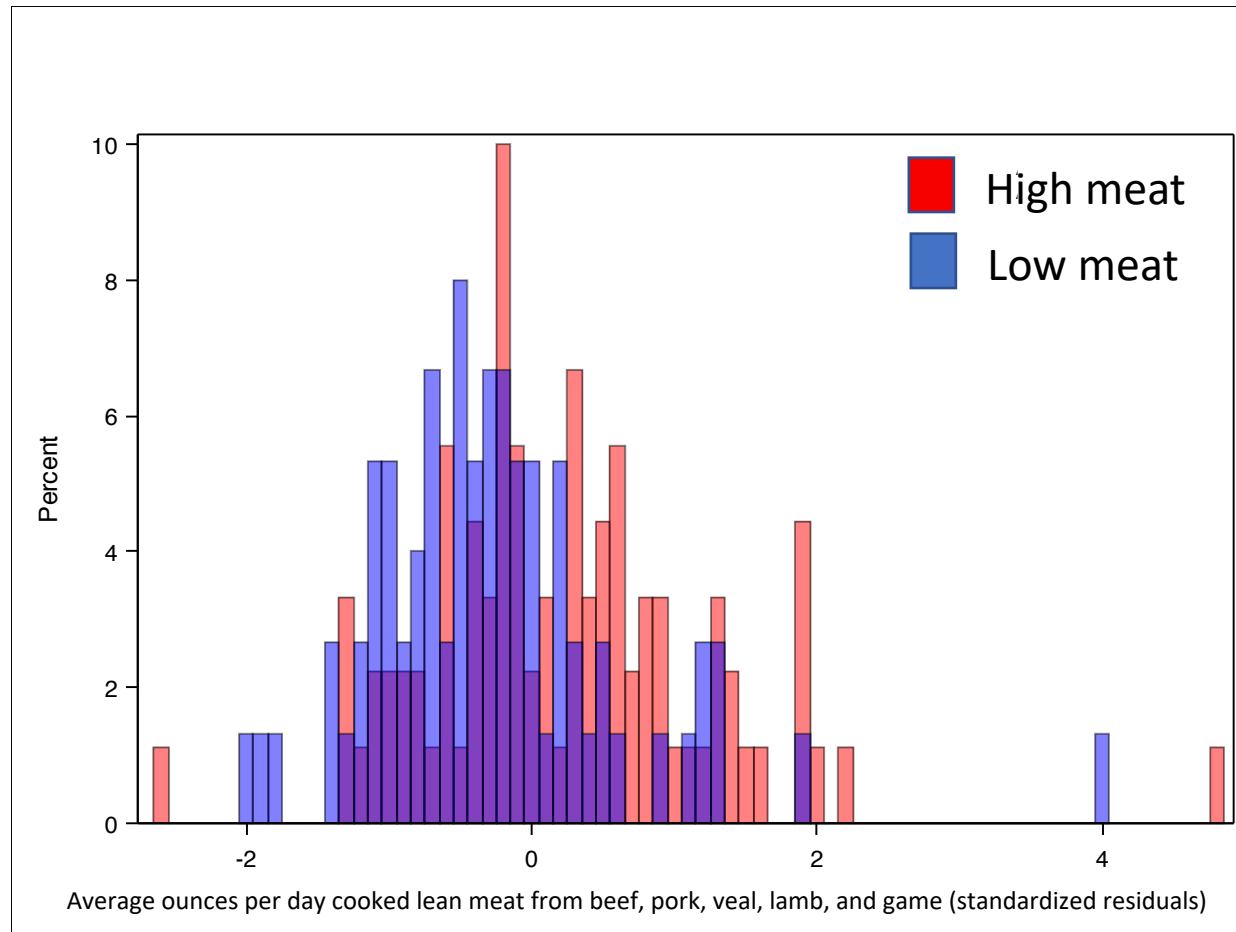

Supplement: NIHMS1524376-supplement-1.pdf [file NIHMS1524376-supplement-1.pdf]

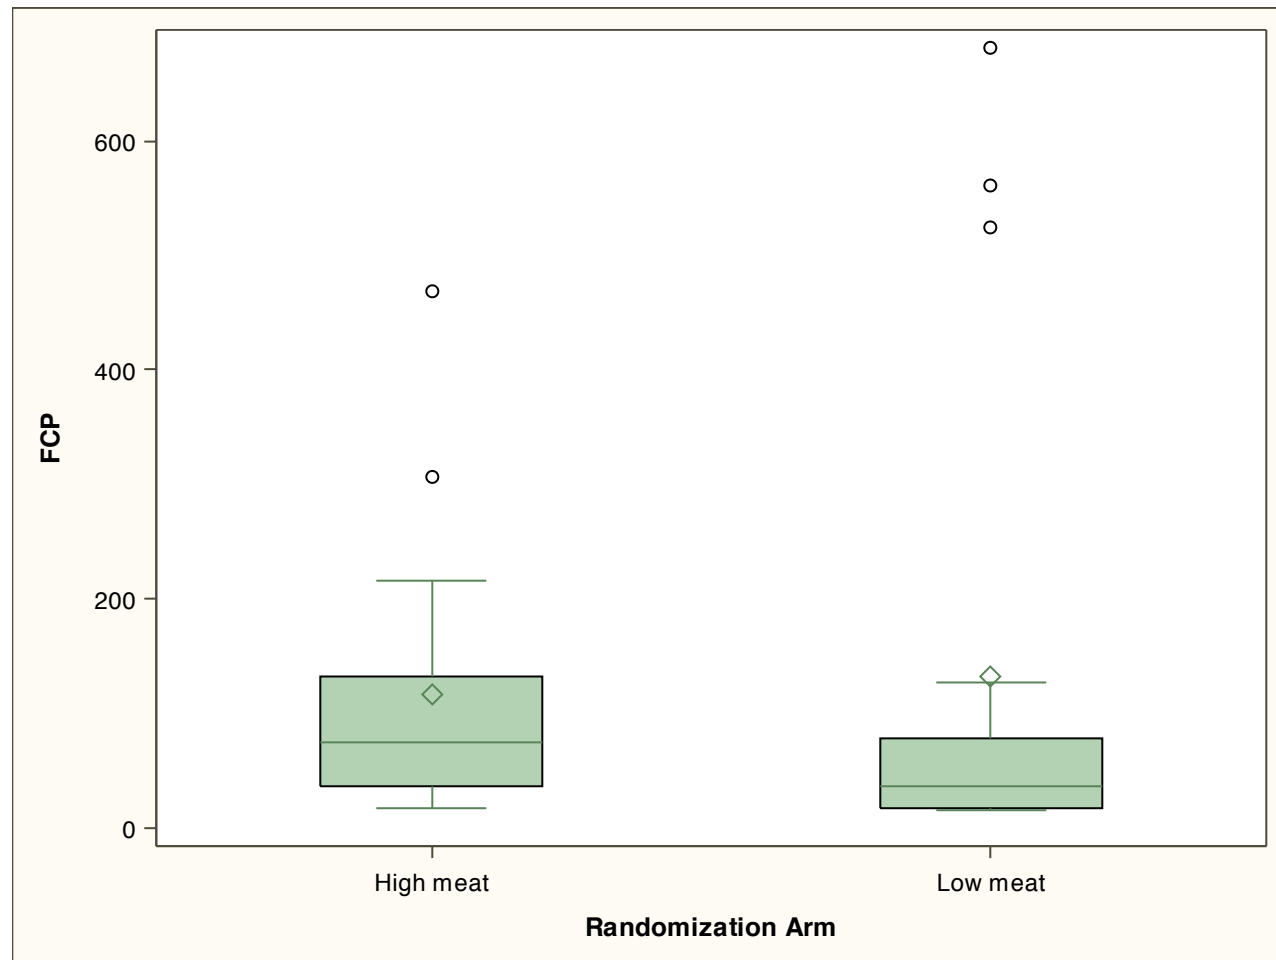

Supplement: NIHMS1524376-supplement-2.pdf [file NIHMS1524376-supplement-2.pdf]
